# Supplementary material for: Impact of Bentonite Clay on In Situ Pyrolysis vs. Hydrothermal Carbonization of Avocado Pit Biomass
Source: MDPI journal article supplement (doi:10.3390/catal12060655), 2022-06-15
Supplement: s1 [file s1]

# Impact of bentonite clay on in situ pyrolysis vs. hydrothermal carbonization of avocado pit biomass

Madeline Karod<sup>1</sup>, Zoe A. Pollard<sup>1</sup>, Maisha T. Ahmad<sup>1</sup>, Guolan Dou<sup>2,3</sup>, Lihui Gao<sup>4</sup>, Jillian. L Goldfarb<sup>1\*</sup>

<sup>1</sup> Department of Biological and Environmental Engineering, Cornell University, Ithaca NY 14853

<sup>2</sup> School of Safety Engineering, China University of Mining and Technology, Xuzhou 221116, China

<sup>3</sup> Key Laboratory of Gas and Fire Control for Coal Mines, China University of Mining and Technology, Xuzhou 221116, China

<sup>4</sup> School of Environmental Science and Spatial Informatics, China University of Mining and Technology, Xuzhou 221116, China

\* Correspondence: goldfarb@cornell.edu; JillianLGoldfarb@gmail.com; Tel.: +1 (607) 255 5789

## Supplemental Information (*for online publication only*)

### Contents

|                  |                                                                       |    |
|------------------|-----------------------------------------------------------------------|----|
| <b>Table S1</b>  | Complete compound species breakdown for bio-oils as detected by GC-MS | S1 |
| <b>Figure S1</b> | Gas chromatograms of biofuel analysis                                 | S3 |
| <b>Table S2</b>  | HP-LC analysis of aqueous product from hydrothermal carbonization     | S3 |
| <b>Table S3</b>  | Water content of pyrolysis bio-oil                                    | S4 |
| <b>Table S4</b>  | Pyrolysis and HTC yields and O/C ratios.                              | S4 |
| <b>Figure S2</b> | Thermal stability curve for bentonite clay                            | S5 |
| <b>Figure S3</b> | SEM image of bentonite clay                                           | S6 |

**Table S1:** Complete compound species breakdown for bio-oils as detected by GC-MS. Reporting mg compound / kg biomass informs how much biomass you require to produce the various compounds detected in the bio-oil. Percent of each compound type out of detectable compounds. Total concentrations of detectable compounds ranged 30,000 -50,000 mg compound / kg biomass.

| Group<br><br><i>Compound</i>                                                                                                                                                                                      | Pyrolysis @ 600°C                                   |                                                                           |                                                 | HTC @ 250°C                                                               |                                                     |                                                   |
|-------------------------------------------------------------------------------------------------------------------------------------------------------------------------------------------------------------------|-----------------------------------------------------|---------------------------------------------------------------------------|-------------------------------------------------|---------------------------------------------------------------------------|-----------------------------------------------------|---------------------------------------------------|
|                                                                                                                                                                                                                   | Avocado                                             |                                                                           | Avocado + Bentonite Clay                        | Avocado                                                                   |                                                     | Avocado + Bentonite Clay                          |
|                                                                                                                                                                                                                   | mg compound / kg bio-oil                            |                                                                           |                                                 |                                                                           |                                                     |                                                   |
| <b>Alcohol</b><br><br>Cyclopropyl carbinol<br><i>% Total Conc.</i>                                                                                                                                                | 19366.32                                            | ± 9916.49<br><i>10.89%</i>                                                | 3819.7                                          | ± 61.1<br><i>9.71%</i>                                                    |                                                     |                                                   |
| <b>Aldehyde</b><br><br>Pentanal<br><i>% Total Conc.</i>                                                                                                                                                           |                                                     |                                                                           | 1518.18                                         | ± 698.2<br><i>3.86%</i>                                                   |                                                     |                                                   |
| <b>Alkane</b><br><br>Dodecane<br>Undecane<br>Octadecane, 1-chloro-<br><i>% Total Conc.</i>                                                                                                                        | 2245.31                                             | ± 3175.35<br><i>1.26%</i>                                                 | 181.18<br>44.47                                 | ± 113.96<br>± 62.89<br><i>0.57%</i>                                       |                                                     |                                                   |
| <b>Alkene</b><br><br>1-Tetradecene<br><i>% Total Conc.</i>                                                                                                                                                        |                                                     |                                                                           | 216.67                                          | ± 40.5<br><i>0.55%</i>                                                    |                                                     |                                                   |
| <b>Ester</b><br><br>1,2-Benzenediol, 4-methyl-<br>1,2-Ethanediol, dipropanoate<br><i>% Total Conc.</i>                                                                                                            | 325.27<br>400.18                                    | ± 81.12<br>± 79.37<br><i>0.41%</i>                                        | 168.2                                           | ± 11.59<br><i>0.43%</i>                                                   |                                                     |                                                   |
| <b>Furan</b><br><br>2(3H)-Furanone, 5-methyl-<br>2(5H)-Furanone<br>2-Furanmethanol, acetate<br>2-Furanmethanol, tetrahydro-<br>5-Methylfurfural<br>Benzofuran<br>Ethanone, 1-(2-furanyl)-<br><i>% Total Conc.</i> | 1729.05<br>4064.4<br>5719.99<br>1439.83<br>12835.71 | ± 735.79<br>± 5747.94<br>± 203.13<br>± 998.5<br>± 5275.7<br><i>14.50%</i> | 840.91<br>1004.71<br>456.43<br>748.74<br>950.66 | ± 33.65<br>± 1420.88<br>± 206.42<br>± 912.36<br>± 277.77<br><i>10.17%</i> | 598.35 ± 329.08<br>119.67 ± 41.88<br><i>100.00%</i> | 597.7 ± 328.73<br>206.74 ± 72.44<br><i>73.95%</i> |
|                                                                                                                                                                                                                   |                                                     |                                                                           |                                                 |                                                                           |                                                     |                                                   |

|                                          |          |   |         |         |   |                 |
|------------------------------------------|----------|---|---------|---------|---|-----------------|
| <b>Ketone</b>                            |          |   |         |         |   |                 |
| 1,2-Cyclopentanedione                    | 6714.16  | ± | 4072.06 | 907.47  | ± | 420.91          |
| 1H-Inden-1-one, 2,3-dihydro-             | 9598.5   | ± | 3297.08 | 1680.86 | ± | 269.39          |
| 2-Butanone                               | 979.76   | ± | 1385.59 |         |   |                 |
| 2-Butanone, 1-(acetyloxy)-               | 2272.02  | ± | 3213.11 | 1036.32 | ± | 1465.58         |
| 2-Cyclopenten-1-one                      | 5046.57  | ± | 333.88  | 698.65  | ± | 988.04          |
| Ketone (cont.)                           |          |   |         |         |   |                 |
| 2-Cyclopenten-1-one, 2-hydroxy-3-methyl- | 13950    | ± | 5135.66 | 1764.52 | ± | 342.81          |
| 2-Cyclopenten-1-one, 2-methyl-           | 3744.04  | ± | 1172.93 | 1000.65 | ± | 608.2           |
| 2-Hydroxy-gamma-butyrolactone            | 3344.8   | ± | 1826.6  |         |   |                 |
| % Total Conc.                            | 25.67%   |   |         | 18.01%  |   | 283.43 ± 130.41 |
|                                          |          |   |         |         |   | 26.05%          |
| <b>Phenol</b>                            |          |   |         |         |   |                 |
| Naphthalene                              | 5704.62  | ± | 804.14  | 1687.48 | ± | 2386.46         |
| Naphthalene, 2-methyl-                   | 8311.26  | ± | 1171.96 | 2373.09 | ± | 3356.06         |
| o-Xylene                                 | 485.13   | ± | 686.08  | 284.66  | ± | 110.34          |
| Phenol                                   | 10329.89 | ± | 1053.39 | 4460.03 | ± | 545.94          |
| Phenol, 2,3,6-trimethyl-                 |          |   |         | 2831.89 | ± | 229.28          |
| Phenol, 2,3-dimethyl-                    |          |   |         | 196.75  | ± | 170.58          |
| Phenol, 2,5-dimethyl-                    |          |   |         | 152.32  | ± | 100.16          |
| Phenol, 2,6-dimethoxy-                   | 8524.59  | ± | 682.11  |         |   |                 |
| Phenol, 2-methyl-                        | 7170.58  | ± | 953.9   | 1997.31 | ± | 1678.1          |
| Phenol, 3,4-dimethyl-                    | 124.58   | ± | 176.19  | 65.91   | ± | 93.21           |
| Phenol, 3,5-dimethyl-                    | 400.52   | ± | 43.06   | 107.2   | ± | 151.6           |
| Phenol, 3-ethyl-                         | 128.86   | ± | 182.2   | 53.25   | ± | 75.3            |
| Phenol, 3-methyl-                        | 10384.53 | ± | 4761.75 | 3394.65 | ± | 4800.75         |
| Styrene                                  |          |   |         | 152.46  | ± | 215.61          |
| 2-Propenal, 3-phenyl-                    |          |   |         | 1514.91 | ± | 635.97          |
| Benzene, 1-butynyl-                      | 2783.37  | ± | 3936.28 |         |   |                 |
| Benzene, 1-propynyl-                     | 1419.11  | ± | 2006.92 | 1172.07 | ± | 26.96           |
| Catechol                                 | 11149.22 | ± | 1945.76 | 561.58  | ± | 92.91           |
| Ethylbenzene                             | 743.96   | ± | 1052.12 | 410.81  | ± | 110.78          |
| Fluorene                                 |          |   |         | 180.38  | ± | 255.1           |
| % Total Conc.                            | 38.05%   |   |         | 54.88%  |   |                 |
| <b>Oxygenated Aromatics</b>              |          |   |         |         |   |                 |
| Maltol                                   | 16367.72 | ± | 1700.91 | 589.19  | ± | 833.24          |
| % Total Conc.                            | 9.21%    |   |         | 1.50%   |   |                 |
| <b>Other</b>                             |          |   |         |         |   |                 |
| Indole                                   |          |   |         | 127.66  | ± | 180.53          |

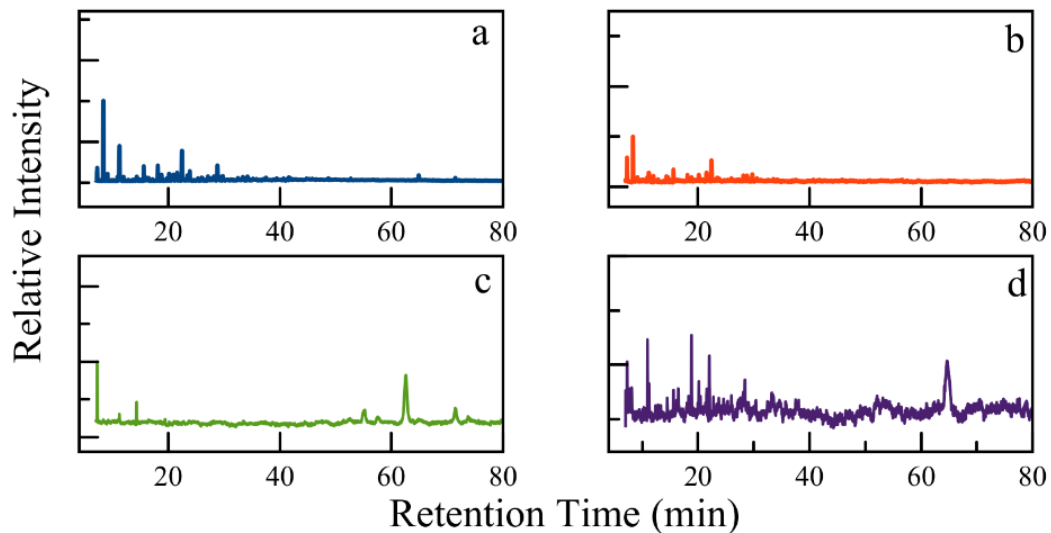

**Figure S1:** Gas chromatograms of biofuel analysis from pyrolysis of avocado pits (a) and avocado pits + Fuller's Earth (b) and hydrothermal carbonization at 250 °C of avocado pits (c) and avocado pits + Fuller's Earth (d). Chromatograms are normalized to relative intensity.

**Table S2:** HP-LC analysis of aqueous product from hydrothermal carbonization of avocado and avocado + bentonite clay. The detected compound concentrations are reported in ppm of the analyzed HTC water.

|                        | Avocado             | Avocado + Bentonite Clay |
|------------------------|---------------------|--------------------------|
| Compound               | Concentration (PPM) |                          |
| <b>Furan</b>           |                     |                          |
| 2 (5H) Furanone        | 1.32E+04            | -                        |
| % Total Conc.          | 100.00%             |                          |
| <b>Carboxylic Acid</b> |                     |                          |
| Formic Acid            | -                   | 5.84E+03                 |
| Propionic Acid         | -                   | 1.55E+05                 |
| % Total Conc.          |                     | 100.00%                  |

**Table S3:** Water content of pyrolysis bio-oil determined in triplicate and reported as average %wt  $\pm$  one standard deviation.

|                          | Water Content (wt%) |       |      |
|--------------------------|---------------------|-------|------|
| <i>Pyrolysis Bio-Oil</i> |                     |       |      |
| Avocado                  | 2.42                | $\pm$ | 0.39 |
| Avocado + Clay           | 1.18                | $\pm$ | 0.26 |
| <i>HTC Bio-oil</i>       |                     |       |      |
| Avocado                  | 0.58                | $\pm$ | 0.10 |
| Avocado + Clay           | 2.24                | $\pm$ | 0.04 |

**Table S4:** Pyrolysis and HTC yields and O/C ratios. Pyrolysis ran in triplicate and reported as an average  $\pm$  one standard deviation, with the data ranges included below. HTC ran in duplicate and reported as an average of two values and data ranges below. O/C ratios determined for GC-MS detected compounds eluted between 6 – 200 minutes.

| Yield (Weight %)               |                  |                  |                  | Bio-oil<br>O/C Ratio |
|--------------------------------|------------------|------------------|------------------|----------------------|
|                                | Solid            | Liquid           | Gas              |                      |
| Pyrolysis @ 600°C for 0.5 hour |                  |                  |                  |                      |
| <b>Avocado</b>                 | 32.30 $\pm$ 4.49 | 36.86 $\pm$ 4.95 | 33.89 $\pm$ 3.30 | 0.62 $\pm$ 0.08      |
| <i>Data</i>                    |                  |                  |                  |                      |
| <i>Range</i>                   | 26.66 – 35.81    | 32.52 – 42.45    | 31.09 – 37.53    | 0.53 – 0.67          |
| <b>Avocado<br/>+ Clay</b>      | 34.85 $\pm$ 1.66 | 40.45 $\pm$ 0.59 | 26.70 $\pm$ 2.25 | 0.45 $\pm$ 0.18      |
| <i>Data</i>                    |                  |                  |                  |                      |
| <i>Range</i>                   | 32.13 – 37.57    | 31.64 – 45.26    | 17.17 – 36.23    | 0.24 – 0.56          |
| HTC @ 250°C for 1 hour         |                  |                  |                  |                      |
| <b>Avocado</b>                 | 26.33            | 54.29            | 19.38            | 0.73                 |
| <i>Data</i>                    |                  |                  |                  |                      |
| <i>Range</i>                   | 15.89 – 36.78    | 49.70 – 58.88    | 13.52 – 25.23    | 0.69 – 0.77          |
| <b>Avocado<br/>+ Clay</b>      | 35.98            | 41.40            | 22.62            | 0.35                 |
| <i>Data</i>                    |                  |                  |                  |                      |
| <i>Range</i>                   | 33.40 – 38.56    | 37.33 – 45.48    | 15.96 – 29.27    | 0.23 – 0.66          |

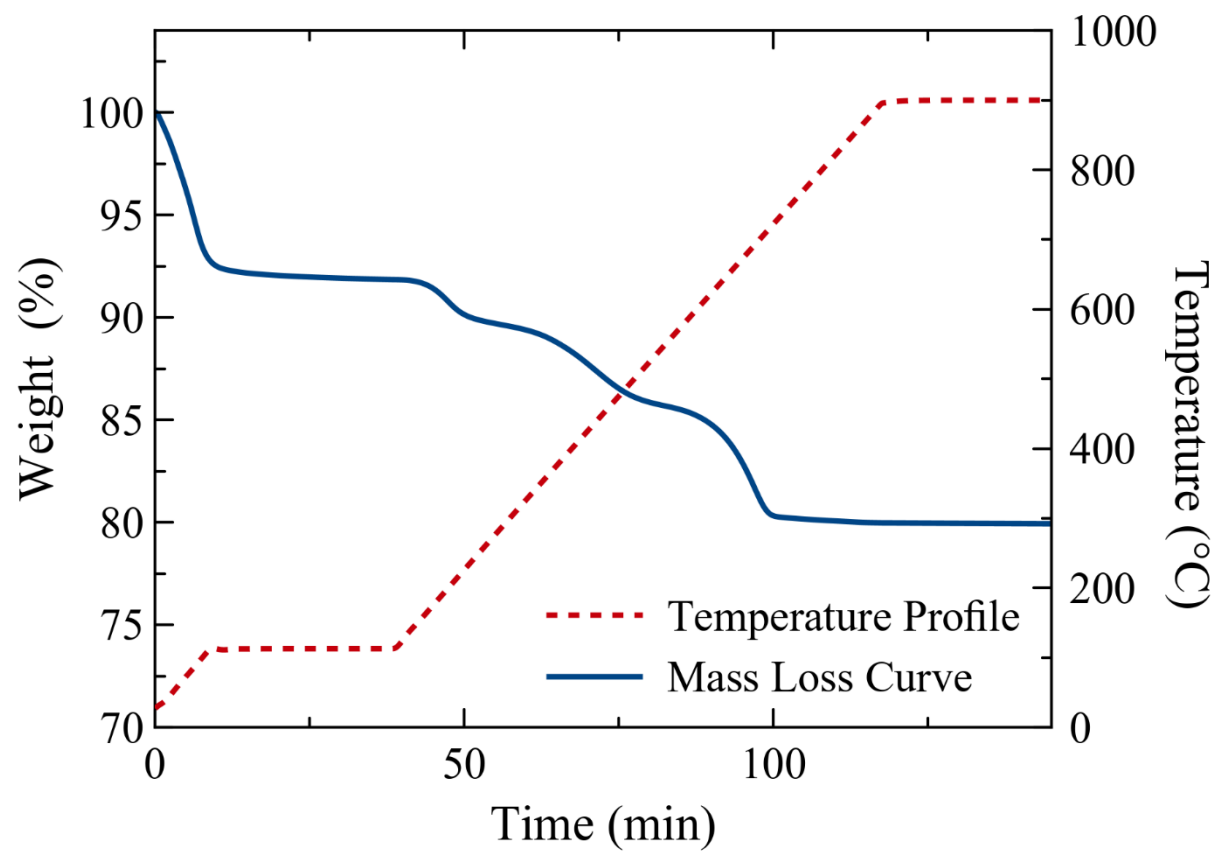

**Figure S2:** Thermal stability of bentonite clay in an inert atmosphere mimicking pyrolysis experiments.

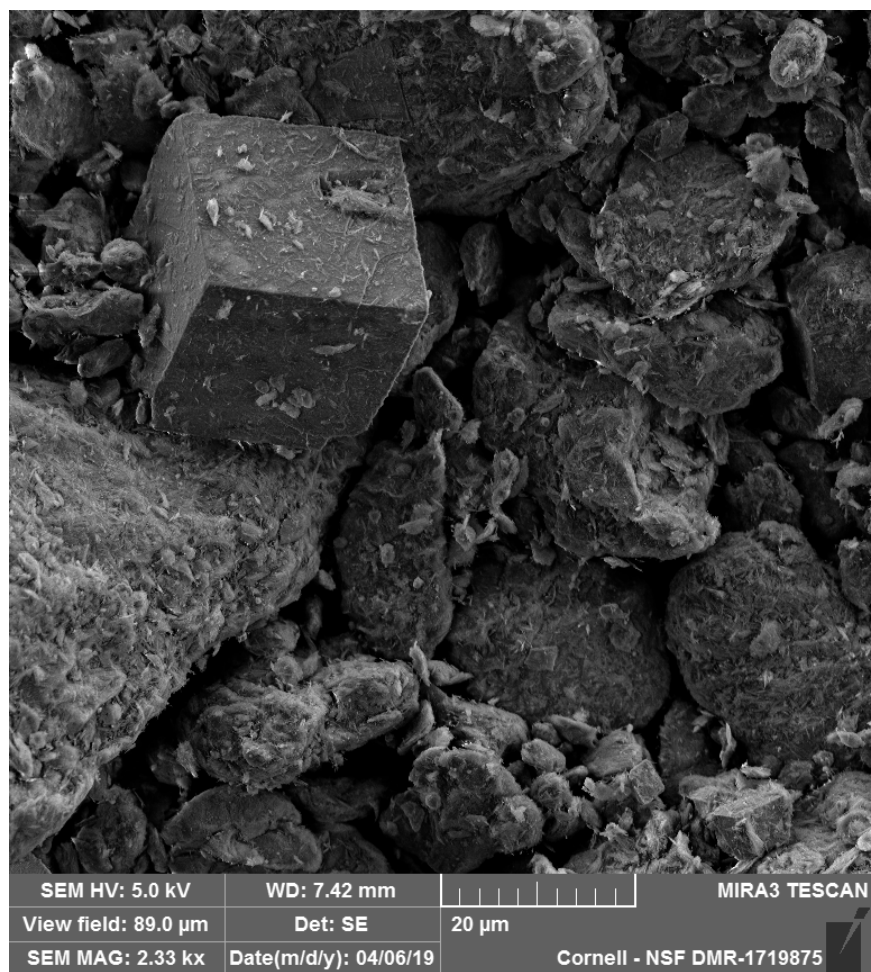

**Figure S3:** SEM image of bentonite clay. Scale bar indicates 20 μm.
